# Supplementary material for: Combining dosiomics and machine learning methods for predicting severe cardiac diseases in childhood cancer survivors: the French Childhood Cancer Survivor Study
Source: PubMed Central journal article supplement (PMC11647004; doi:10.3389/fonc.2024.1241221), 2024-12-02
Supplement: DataSheet1.pdf [file DataSheet1.pdf]

# Supplementary Material

## 1 SUPPLEMENTARY TABLES AND FIGURES

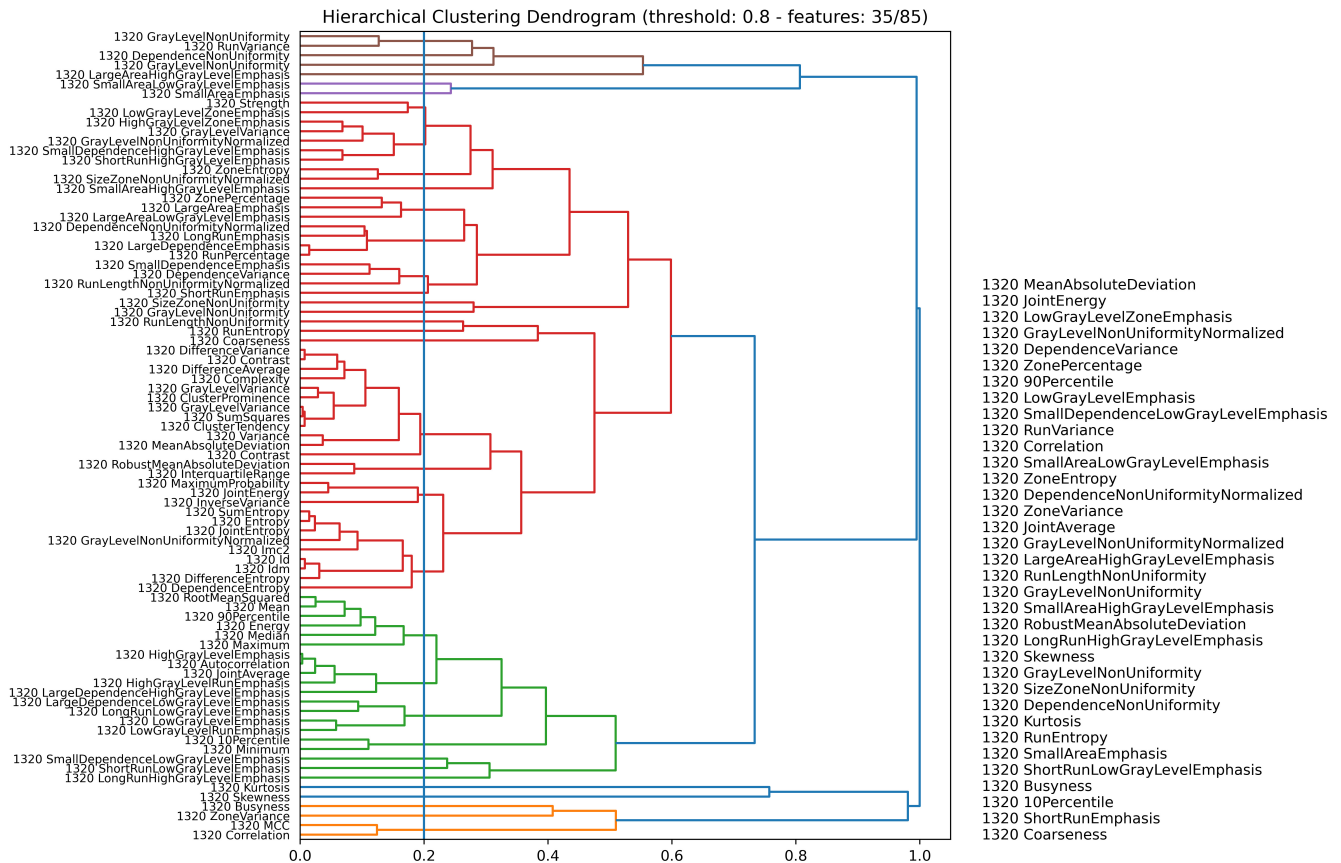

**Figure S1.** Illustration of the clustering-based redundancy elimination. Hierarchical clustering is performed with the distance  $1 - \text{Kendall's tau}$  over the dosiomics extracted from the whole heart, with a threshold of 0.8. We select the best feature among each cluster by performing a multivariate Cox adjusted on the cluster's features. The selected features are shown on the right side. In this procedure, 35 features were kept over 85.

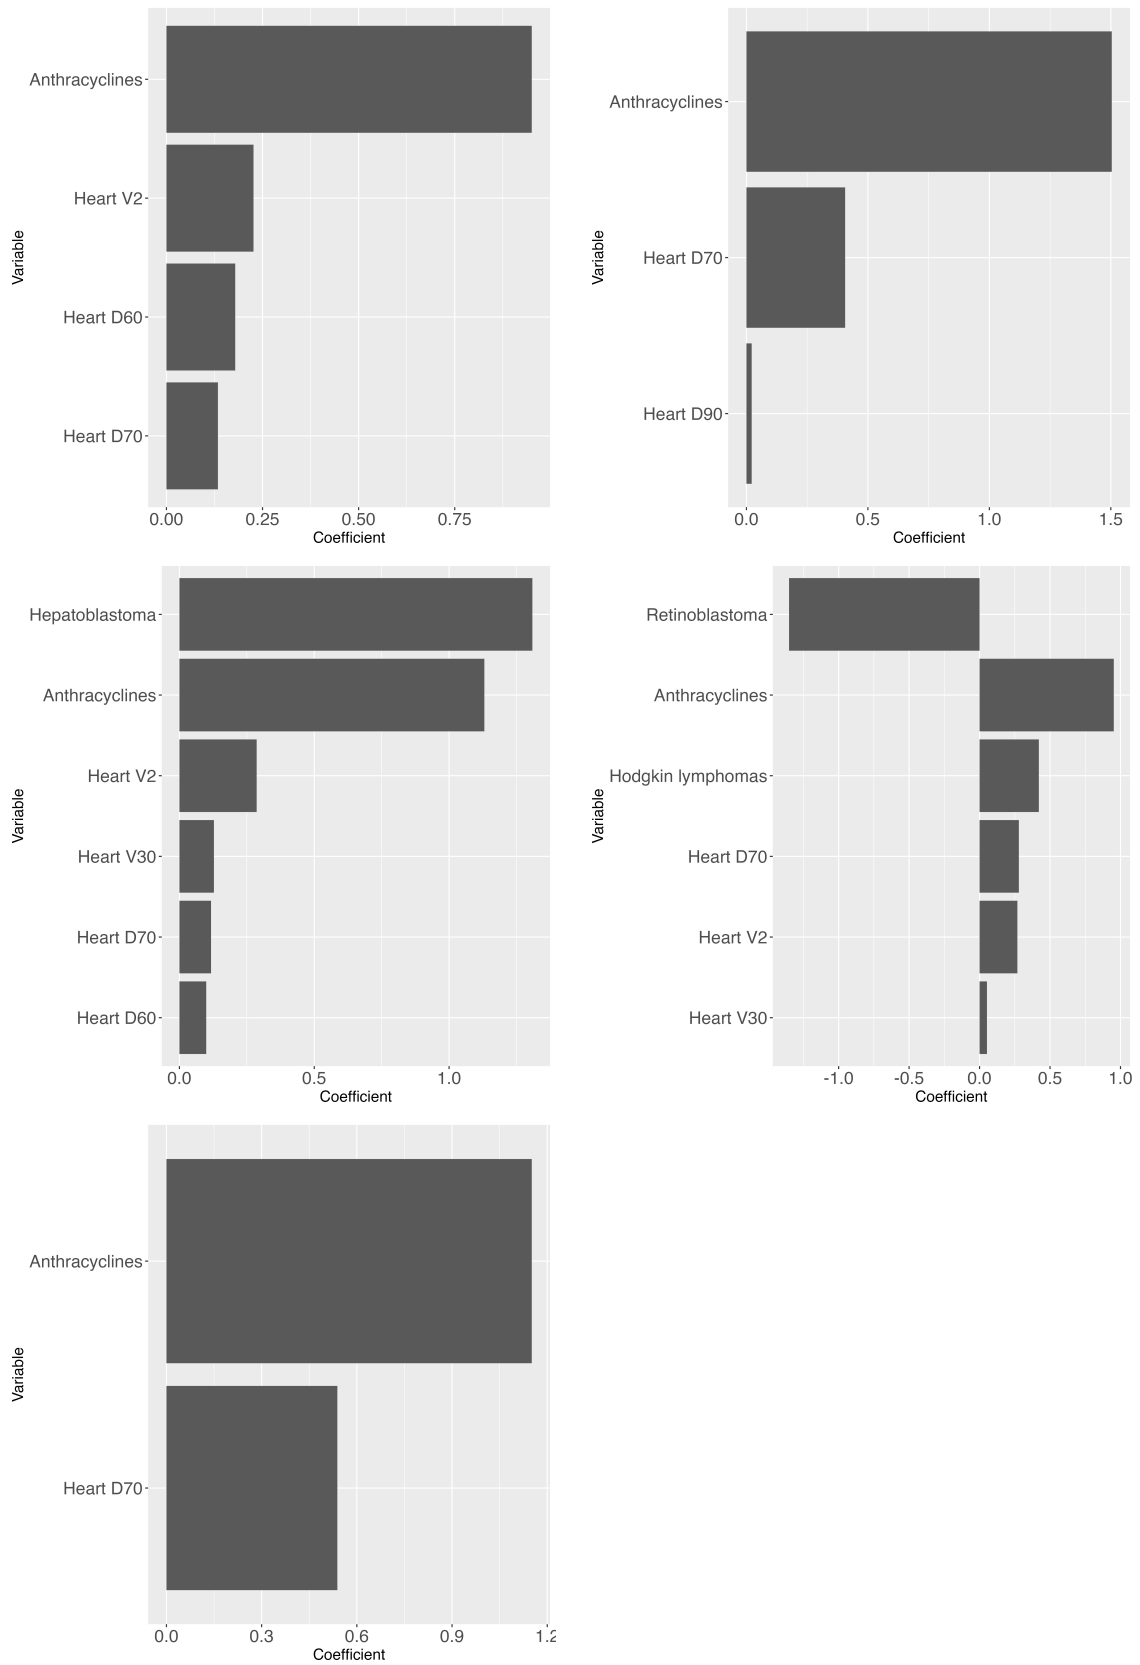

**Figure S2.** Model: Cox Lasso adjusted on the dose-volume indicators. Coefficients of the variables selected by the Lasso for each fold of the 5-fold cross-validation.

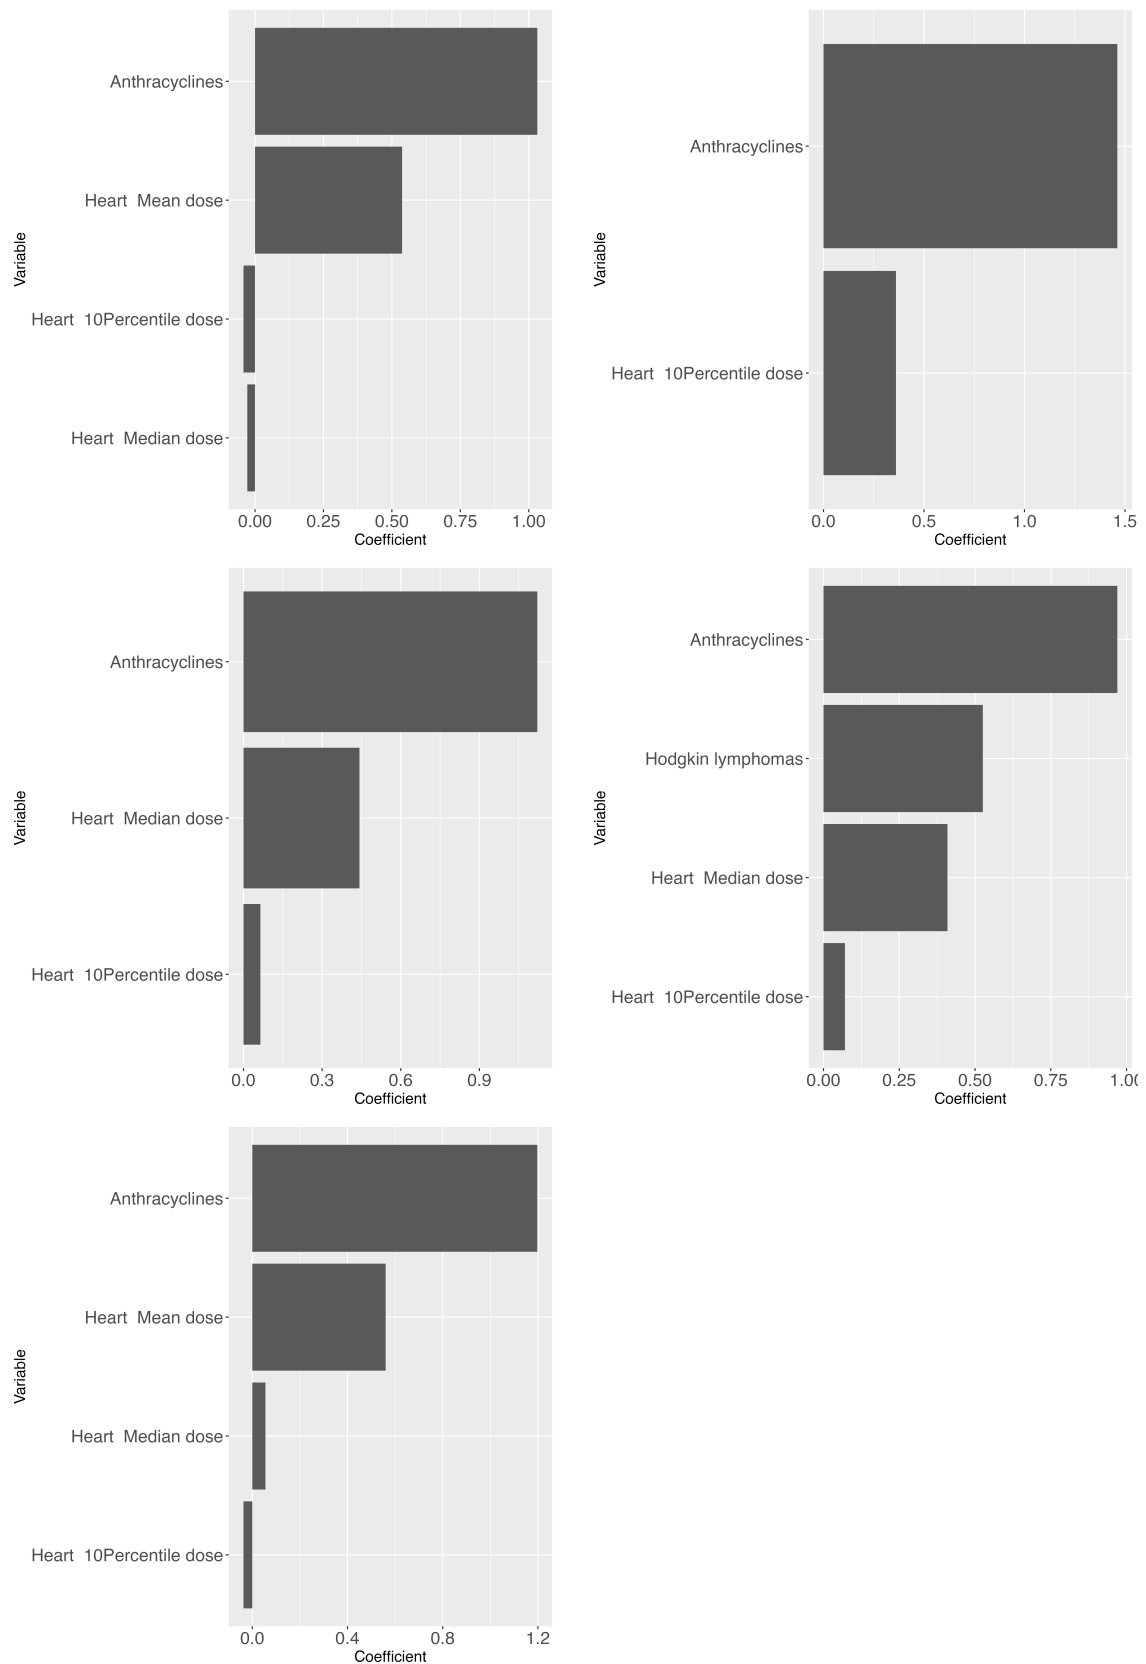

**Figure S3.** Model: Cox Lasso adjusted on the first-order dosiomics. Coefficients of the variables selected by the Lasso for each fold of the 5-fold cross-validation.
